# Supplementary material for: Early minimal residual disease eradication in light chain amyloidosis generates deeper and faster cardiac response
Source: Research Square preprint supplement (doi:10.21203/rs.3.rs-3710783/v1), 2023-12-11
Supplement: Supplementary file 1 [file 81f92c7bd22098d2c27bdabe.docx]

Supplementary Table 1. Proportion of cardiac response ≥CarPR and ≥CarVGPR throughout first-line therapy in clinically relevant subgroups

| Subgroups/% | ≥CarPR | Early MRD neg | Early MRD pos | P | ≥CarVGPR | Early MRD neg | Early MRD pos | P |
| --- | --- | --- | --- | --- | --- | --- | --- | --- |
| t(11;14)- | 46.9 | 60.0 | 35.3 | 0.162 | 31.3 | 46.7 | 17.6 | 0.128 |
| t(11;14)+ | 48.1 | 100 | 39.1 | **0.041**** | 11.1 | 25.0 | 8.7 | 0.395 |
| Not IIIb | 47.3 | 66.7 | 37.8 | **0.044**** | 18.2 | 33.3 | 10.8 | 0.063* |
| IIIb | 50.0 | 66.7 | 40.0 | 1.000 | 37.5 | 66.7 | 20.0 | 0.464 |
| BMPCs<10% | 43.3 | 53.8 | 35.3 | 0.310 | 23.3 | 30.8 | 17.6 | 0.666 |
| BMPCs≥10% | 51.5 | 87.5 | 40.0 | **0.039**** | 18.2 | 50.0 | 8.0 | **0.020**** |

***P*<0.05, **P*<0.1.
